# Supplementary material for: Polyethyleneimine-mediated seed growth approach for synthesis of silver-shell silica-core nanocomposites and their application as a versatile SERS platform
Source: Royal Society of Chemistry journal article supplement (doi:10.1039/c6ra28629a), 2017-01-01
Supplement: c6ra28629a1.pdf [file c6ra28629a1.pdf]

## Supporting Information

### Polyethyleneimine-mediated seed growth approach for synthesis of silver-shell silica-core nanocomposites and their application as a versatile SERS platform

Chongwen Wang,<sup>‡ab</sup> Min Li,<sup>‡bc</sup> Qingjun Li,<sup>‡bc</sup> Kehan Zhang,<sup>b</sup> Chaoguang Wang,<sup>b</sup> Rui Xiao,<sup>\*b</sup> and Shengqi Wang<sup>\*abc</sup>

<sup>a</sup>College of Life Sciences & Bio-Engineering, Beijing University of Technology, Beijing 100124, PR China. E-mail: sqwang@bmi.ac.cn.

<sup>b</sup>Beijing Institute of Radiation Medicine, Beijing 100850, PR China. Beijing 100850, PR China. E-mail: ruixiao203@sina.com.

<sup>c</sup>Henan University of Chinese Medicine, Zhengzhou, Henan 450008, PR China.

<sup>‡</sup> These authors contributed equally to this work.

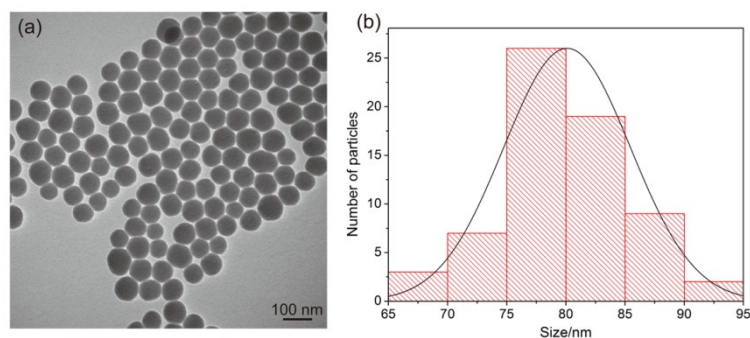

**Fig. S1** (a) TEM images of SiO<sub>2</sub> NPs, and (b) the statistical histogram of the corresponding nanoparticle size.

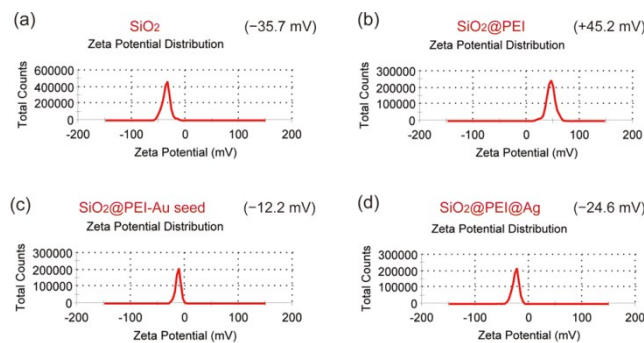

**Fig. S2** Zeta potentials of (a) SiO<sub>2</sub>, (b) SiO<sub>2</sub>@PEI, (c) SiO<sub>2</sub>@PEI-Au seed, and (d) SiO<sub>2</sub>@PEI@Ag NPs in aqueous solution.

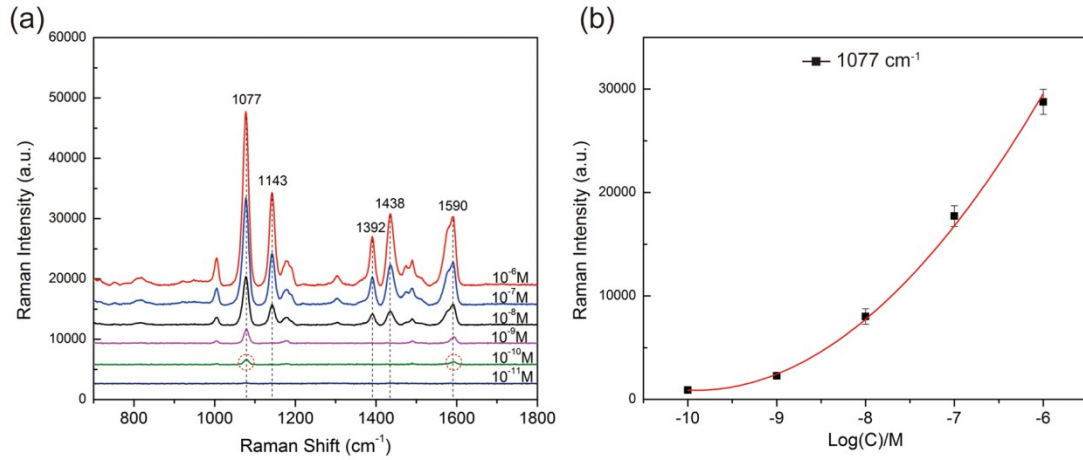

**Fig. S3** (a) The SERS spectra of PATP measured with different concentrations on the SiO<sub>2</sub>@PEI@Ag NPs. (b) The intensity–concentration calibration curve for PATP at a concentration range of  $1.0 \times 10^{-6}$  to  $1.0 \times 10^{-10}$  M by using SERS intensity at  $1077 \text{ cm}^{-1}$ . The error bars represent the standard deviations from 5 measurements.

#### S4 EF calculation:

To quantify the enhancement ability of the SiO<sub>2</sub>@PEI@Ag NPs, the enhancement factor (EF) was calculated as the ratio of photons scattered by the SERS substrate and the normal substrate. EF was estimated according to the following equation:

$EF = (I_{\text{SERS}}/I_{\text{bulk}})(N_{\text{bulk}}/N_{\text{SERS}})$ , whereas  $N_{\text{bulk}}$  and  $N_{\text{SERS}}$  is the number of molecules contributed to the Raman and SERS signal, respectively, and  $I_{\text{SERS}}$  and  $I_{\text{bulk}}$  is the respective signal intensity of the related peaks. However, intrinsic EF is difficult to estimate because several variables, such as adsorbed molecules and laser scattering volume, are difficult to obtain. In our experiment, all the other parameters, including the laser diameter, laser power, exposure time, and microscopic magnification, were identical. The chemical droplets were of the same volume, and the number of detected PATP molecules was proportional to its concentration. Therefore, the EF was roughly estimated by comparing the intensity of the Raman peak in the SERS spectrum with that in the normal Raman spectrum according to the equation  $EF = (I_{\text{SERS}}/I_{\text{RS}}) \times (C_{\text{RS}}/C_{\text{SERS}})$ , where  $I_{\text{SERS}}$  and  $I_{\text{RS}}$  are the vibration intensities in the SERS and normal Raman spectra of PATP molecules, and  $C_{\text{RS}}$  and  $C_{\text{SERS}}$  are the concentrations of the PATP molecules in the SERS and reference samples, respectively.

The peak at  $1077 \text{ cm}^{-1}$  from the PATP Raman spectrum (Fig. S4) was chosen for analysis, and the intensities for peaks (a) and (d) were 1249 and 8157 a.u., respectively. The PATP concentrations for peaks (a) and (d) were  $10^{-1}$  M and  $10^{-8}$  M, respectively. Therefore, the EF of the SiO<sub>2</sub>@PEI@Ag NPs was roughly estimated to be  $6.53 \times 10^7$ .

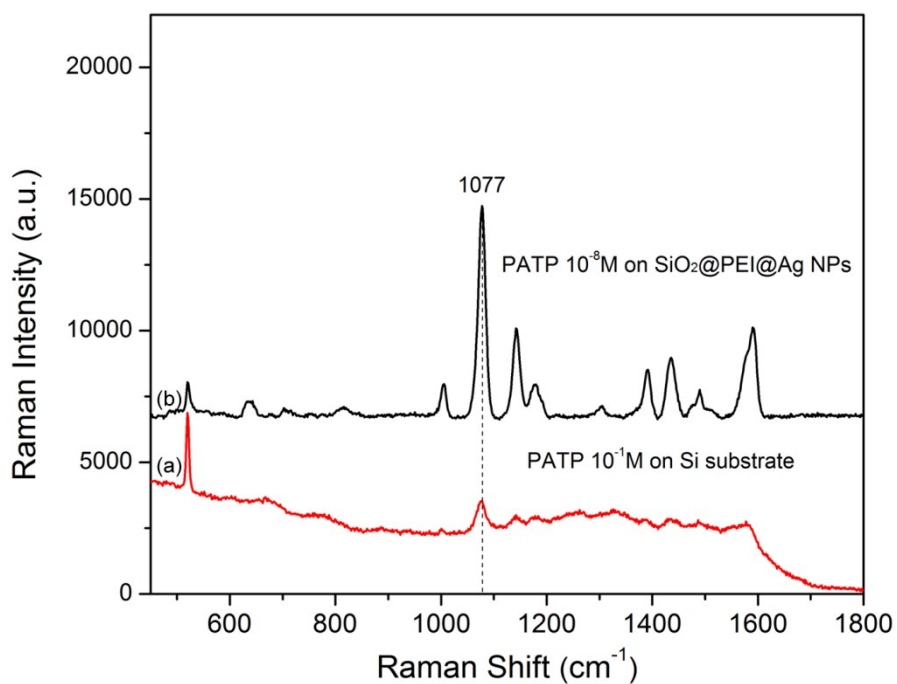

**Fig. S4** Raman spectra recorded of PATP molecules with (black) and without (red) the SiO<sub>2</sub>@PEI@Ag NPs.

**Table S1**

| Raman shift (cm <sup>-1</sup> ) | Assignment                                      |
|---------------------------------|-------------------------------------------------|
| 932                             | $\nu(\text{CH}_3\text{N})$ or $\nu(\text{C-S})$ |
| 1148                            | $\rho(\text{CH}_3)$ or $\nu(\text{C-N})$        |
| 1383                            | $\rho(\text{CH}_3)$                             |
| 1508                            | $\nu(\text{C-N})$                               |

**Table S1** Raman peaks of thiram and corresponding assignments.

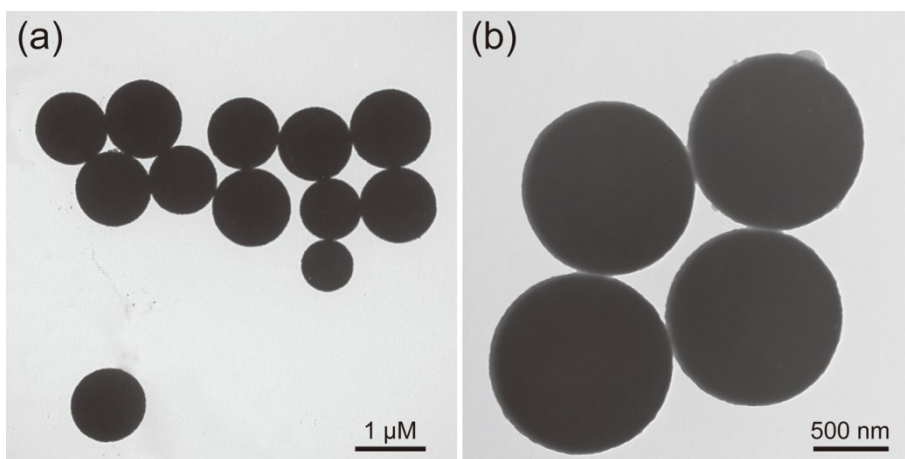

**Fig. S5** TEM images of (a)  $\alpha\text{-Fe}_2\text{O}_3$ , (b)  $\alpha\text{-Fe}_2\text{O}_3@\text{SiO}_2$  microspheres.
